# Supplementary material for: Aristolochic Acid I-Induced Hepatotoxicity in Tianfu Broilers Is Associated with Oxidative-Stress-Mediated Apoptosis and Mitochondrial Damage
Source: MDPI journal article supplement (doi:10.3390/ani11123437), 2021-12-02

Supplementary figure S1. The flow cytometry quadrant diagrams of ROS levels in liver.

A: CG group, B: LAG group, C: MAG group, D: HAG group.

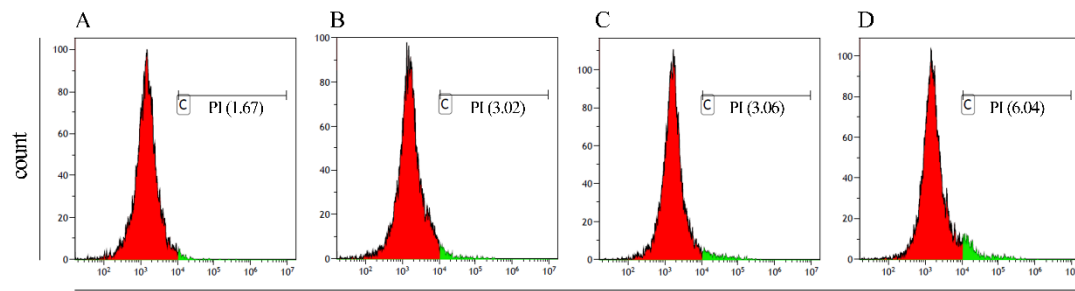

Supplementary figure S2. The flow cytometry quadrant diagrams of apoptosis in liver.

A: CG group, B: LAG group, C: MAG group, D: HAG group.

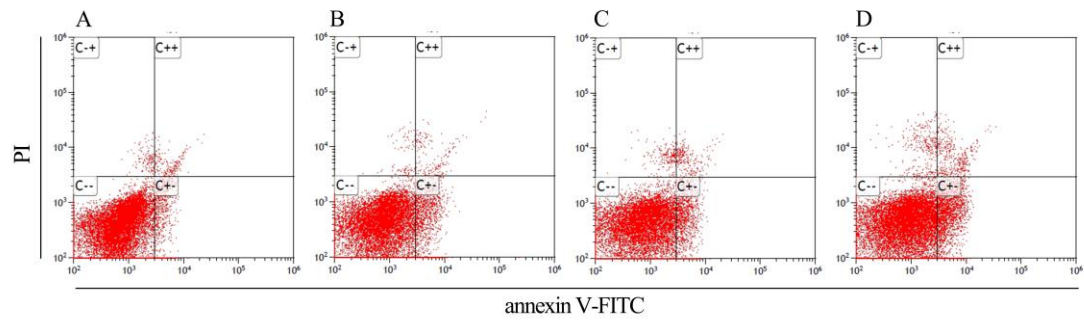

Supplementary figure S3. The flow cytometry quadrant diagrams of mitochondrial depolarization ratio in liver. A: CG group, B: LAG group, C: MAG group, D: HAG group.

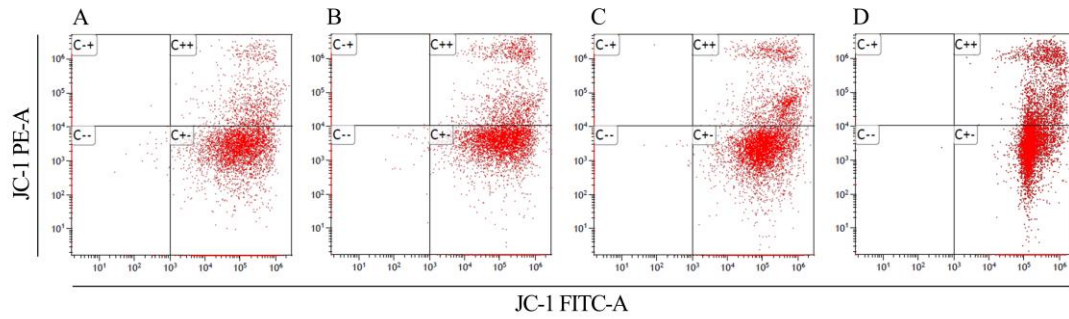

Supplement: s1 [file s1]
