# Supplementary material for: Aristolochic Acid I-Induced Hepatotoxicity in Tianfu Broilers Is Associated with Oxidative-Stress-Mediated Apoptosis and Mitochondrial Damage
Source: Animals (Basel). 2021 Dec 2;11(12):3437. doi: 10.3390/ani11123437 (PMC8698099; doi:10.3390/ani11123437)
Supplement: Supplementary file 1 [file animals-11-03437-s001.zip › Table Supplementary.xls]

## Sheet: Table S1
Table S1 Composition and nutrient levels of the basal diet (air-dry basis) (g/kg)
Ingredients	content	Nutrient levelsb	content
Corn	553	ME (MJ/kg)	12.13
Soybean meal	365.7	CP	205
Admixture oil	28	Lys	11.5
Limestone	13.1	Met + Cys	8.1
CaHPO4	12.6	Ca	9
NaCl	12.6	TP	5.7
Premixa	3
50% choline (50%)	10
Lys	0.2
Met	2.4
a : The premix provided the following per kg of the diet: Cu 8 mg; Fe 90 mg; Zn 50 mg; Mn 80 mg; I 0.30 mg; Se 0.15 mg; vitamin A(Retinol) 10000 IU; vitamin D3(Cholecalciferol) 2,100 IU；vitamin E(tocopherol) 14.97 IU; vitamin K3(menaphthone) 0.6 mg; vitamin Bl(thiamine) 2.0 mg; vitamin B2(Riboflavin) 4.0 ng; vitamin Bl2(cyanocobalamin) 0.01 mg; nicotinic acid 30.0 mg; folic acid 0.6 mg; biotin 0.…

## Sheet: Table S2
Table S2 Primer information for qRT-PCR assays
Gene Name	5’-3’	GenBank Accession No.
Nrf2	F-CTGCCCAAAACTGCCGTA	NM_205117.1 60bp
	R-CAAATCTTGCTCCAGTTCCA
NQO1	F-CTCCGAGTGCTTTGTCTACGA	NM_001277621.1 150bp
	R-ATGGCTGGCATCTCAAACC
HO-1	F-GCTGAAGAAAATCGCCCAA	NM_205344.1 135bp
	R-ATCTCAAGGGCATTCATTCGG
β-actin	F-AGTACCCCATTGAACACGGC	AF199488 98bp
	R-CTCCTCAGGGGCTACTCTCA
